# Supplementary material for: Targeted isolation, sequence assembly and characterization of two white spruce (Picea glauca) BAC clones for terpenoid synthase and cytochrome P450 genes involved in conifer defence reveal insights into a conifer genome
Source: PubMed Central journal article supplement (PMC2729077; doi:10.1186/1471-2229-9-106), 2009-08-06
Supplement: 1471-2229-9-106-S1.pdf [file 1471-2229-9-106-S1.pdf]

|          |                    |                   |                   |                   |                   |            |            |                |
|----------|--------------------|-------------------|-------------------|-------------------|-------------------|------------|------------|----------------|
|          | 340                |                   | 360               |                   | 380               |            | 400        |                |
| Pg_3CAR1 | -----              | -----             | -----             | -----             | -----             | CGATAACGTT | GAACGATTGG | GGATCGACAG 30  |
| Pg_3CAR2 | -----              | -----             | -----             | -----             | -----             | CGATAACGTT | GAACGATTGG | GGATCGACAG 30  |
| Pg_3CAR3 | -----              | -----             | -----             | -----             | -----             | CGATAACGTT | GAACGATTGG | GGATCGACAG 30  |
| Pg_3CAR4 | -----              | -----             | -----             | -----             | -----             | CGATAACGTT | GAACGATTGG | GGATCGACAG 30  |
| Ps_Q09   | <b>GGAGAAITTAG</b> | <b>TGAGTCATGT</b> | <b>CGATGATCTC</b> | <b>CTTCAACACC</b> | <b>TTTCGATGGT</b> | CGATAACGTT | GAACGATTGG | GGATCGACAG 80  |
|          | 420                |                   | 440               |                   | 460               |            | 480        |                |
| Pg_3CAR1 | ACATTTCCAA         | ACTGAGATCA        | AAGTTTCCCT        | CGATTATGTT        | TACAGGTCAG        | TGCTGACAGC | CTTCAAATTT | TTTTATGTT 110  |
| Pg_3CAR2 | ACATTTCCAA         | GCTGAGATAA        | AAGTTTCCCT        | CGATTATGTT        | TACAGGTCAG        | TGCTGACAGC | CTTCAAATTT | TTTTATGTT 110  |
| Pg_3CAR3 | ACATTTCCAA         | ACTGAGATAA        | AAGTTTCCCT        | CGATTATGTT        | TACAGGTCAG        | TGCTGACAGC | CTTCAAATTT | TTTTATGTT 110  |
| Pg_3CAR4 | ACATTTCCAA         | ACTGAGATAA        | AAGTTTCTCT        | TGATTATGTT        | TACAGGTCAG        | TGCTGACGGC | CTTCAAATTT | TTGTTATGTT 110 |
| Ps_Q09   | ACATTTCCAA         | ACTGAGATCA        | AAGTTTCCCT        | CGATTATGTT        | TACAG-----        | -----      | -----      | ----- 125      |
|          | 500                |                   | 520               |                   | 540               |            | 560        |                |
| Pg_3CAR1 | TTCACGACGA         | ATACACTTAA        | AACATAGAAA        | TTATTTTGGC        | CACCAGTT - A      | CTGGAGCGAA | AAAGGCATTG | GACCTGGGAG 189 |
| Pg_3CAR2 | TTCACGACGA         | ATACACTTAA        | AACATAGAAA        | TTATTTTGGC        | CACCAGTT - A      | CTGGAGCGAA | AAAGGCATTG | GACCTGGGAG 189 |
| Pg_3CAR3 | TTCACGACGA         | ATACACTTAA        | AACATAGAAA        | TTATTTTGGC        | CACCAGTT - A      | CTGGAGCGAA | AAAGGCATTG | GACCTGGGAG 190 |
| Pg_3CAR4 | TTCACGACGA         | ATACACTTAA        | AACATAGAAA        | TTATTTTGGC        | CACCAGTT - A      | CTGGAGCGAA | AAAGGCATTG | GATCTGGGAG 189 |
| Ps_Q09   | -----              | -----             | -----             | -----             | TT - A            | CTGGAGCGAA | AAAGGCATTG | GACCTGGGAG 158 |
|          | 580                |                   | 600               |                   | 620               |            | 640        |                |
| Pg_3CAR1 | AGATATTGTT         | TGTGCTGATC        | TCAACACCAC        | TGCCTTGGGG        | TTTCGAGTTC        | TTCGACTACA | TGGATATACT | GTGTTTCCAG 269 |
| Pg_3CAR2 | AGATATTGTT         | TGTGCTGATC        | TCAACACCAC        | TGCCTTGGGG        | TTTCGACTTC        | TTCGACTACA | TGGATATACT | GTGTTTCCAG 269 |
| Pg_3CAR3 | AGATATTGTT         | TGTGCTGATC        | TCAACACGAC        | TGCCTTGGGG        | TTTCGAGTTC        | TTCGACTACA | TGGATATACT | GTGTTTCCGG 270 |
| Pg_3CAR4 | AGATATTGTT         | TGTACTGATC        | TGAACACAAC        | TGCCTTGGGG        | TTTCGAAATC        | TTCGACTACA | TGGATATACT | GTGTTCCGG 269  |
| Ps_Q09   | AGATATTGTT         | TGTGCTGATC        | TCAACACCAC        | TGCCTTGGGG        | TTTCGACTTC        | TTCGACTACA | TGGATATACT | GTGTTTCCAG 238 |
|          | 660                |                   | 680               |                   | 700               |            | 720        |                |
| Pg_3CAR1 | GTATCCGCAT         | TTTATTGATA        | AATCCCTCCT        | TTATTTTCTT        | TAATAAGGCA        | AC-----    | -----      | ----- 321      |
| Pg_3CAR2 | GTATCCGCAT         | TTTATTGATA        | AATCCCTCCT        | TTATTTTCTT        | TAATAAGGCA        | TCTGCGTGTA | GATATTGATA | GTTATATGTA 349 |
| Pg_3CAR3 | GTATCCACAT         | TTTATTGATA        | AATCACTCCT        | TTATTTTCTT        | TAATAAGGCA        | TC-----    | -----      | ----- 322      |
| Pg_3CAR4 | GTATCCACAT         | TTTATTGATA        | AATCACTCCT        | TTATTTTCTT        | TAATAAGGCA        | TC-----    | -----      | ----- 321      |
| Ps_Q09   | -----              | -----             | -----             | -----             | -----             | -----      | -----      | ----- 238      |
|          | 740                |                   | 760               |                   | 780               |            | 800        |                |
| Pg_3CAR1 | -----              | -----             | TGCGTGTAGA        | TATTGATAGT        | TATATGTATT        | TTACGTTTAT | GTCAGACGTG | TTTGAACAAT 381 |
| Pg_3CAR2 | <b>TTTACGTTT</b>   | <b>ATGTCAGACG</b> | TGCGTGTAGA        | TATTGATAGT        | TATATGTATT        | TTACGTTTAT | GTCAGACGTG | TTTGAACAAT 429 |
| Pg_3CAR3 | -----              | -----             | TGCGTGTAGA        | TATTGATAGT        | TATATGTATT        | TTACGTTTAT | GTCAGACGTG | TTTGAACAAT 382 |
| Pg_3CAR4 | -----              | -----             | TGCGTGTAGA        | TATTGATAGT        | TATATGTATT        | TTACGTTTAT | GTCAGACGTG | TTTGAACAAT 381 |
| Ps_Q09   | -----              | -----             | -----             | -----             | -----             | -----      | -----ACGTG | TTTGAACAAT 253 |
|          | 820                |                   | 840               |                   | 860               |            |            |                |
| Pg_3CAR1 | TCAAAGACCA         | GATGGGGCGG        | ATTGCCTGTT        | CCACCAATCA        | GACAGAG           | 428        |            |                |
| Pg_3CAR2 | TCAAAGACCA         | GATGGGGCGG        | ATTGCCTGTT        | CCACCAATCA        | GACAGAG           | 476        |            |                |
| Pg_3CAR3 | TCAAAGACCA         | GATGGGGCGG        | ATTGCCTGTT        | CCACCAATCA        | GACAGAG           | 429        |            |                |
| Pg_3CAR4 | TCAAAGACCA         | GATGGGGCGG        | ATTGCCTGTT        | CCACCAATCA        | GACAGAG           | 428        |            |                |
| Ps_Q09   | TCAAAGACCA         | GATGGGGCGG        | <b>ATTGCCTGTT</b> | <b>CCACCAATCA</b> | <b>GACAGAG</b>    | 300        |            |                |
