# Supplementary material for: Targeted isolation, sequence assembly and characterization of two white spruce (Picea glauca) BAC clones for terpenoid synthase and cytochrome P450 genes involved in conifer defence reveal insights into a conifer genome
Source: PubMed Central journal article supplement (PMC2729077; doi:10.1186/1471-2229-9-106), 2009-08-06
Supplement: 1471-2229-9-106-S5.pdf [file 1471-2229-9-106-S5.pdf]

**Additional file 5: Table S2 - Impact of sequencing depth on assembly quality of PGB04.**

| Number of 384-well plates               | 1       | 2       | 3       | 4         | 5         |
|-----------------------------------------|---------|---------|---------|-----------|-----------|
| Coverage of scaffold (bp) <sup>1</sup>  | 87,046  | 91,759  | 92,289  | 92,418    | 92,452    |
| Coverage of scaffold (%) <sup>2</sup>   | 93.0    | 98.0    | 98.6    | 98.7      | 98.8      |
| Average non-redundant (bp) <sup>3</sup> | 299,266 | 598,532 | 897,797 | 1,197,063 | 1,496,329 |
| Average total size (bp) <sup>4</sup>    | 88,929  | 95,376  | 96,860  | 97,847    | 99,515    |
| Depth (fold) <sup>5</sup>               | 3.2     | 6.4     | 9.6     | 12.8      | 16.0      |

<sup>1,2</sup>The total number of nucleotides in contigs matching the final PGB04 scaffold (93,592 bp) is given in base pairs and percent.

<sup>3</sup>The sum of sequence lengths of all reads assembled into contigs is averaged. Nucleotides in overlapping regions of bidirectional reads were counted once.

<sup>4</sup>The sum of all contigs is given. The sum sometimes exceeds the size of the final PGB04 scaffold.

<sup>5</sup>Sequencing depth was calculated as a function of the average non-redundant base pair divided by the length of the scaffold PGB04.
